# Supplementary material for: Copper-foam supported Ag microstructure for the electrochemical oxidative dehydrogenation of biomass-based furfural and 5-hydroxymethylfurfural
Source: Royal Society of Chemistry journal article supplement (doi:10.1039/d5nj03225c), 2025-01-01
Supplement: d5nj03225c1.pdf [file d5nj03225c1.pdf]

## Supporting Information

### **Copper-foam supported Ag microstructure for electrochemical oxidative dehydrogenation of biomass-based furfural and 5-hydroxymethylfurfural**

Tian Wei<sup>a,#</sup>, Yi-Lin Fan<sup>a,#</sup>, Xu Wang<sup>a</sup>, Wang-Ting Lu<sup>a,\*</sup>, Geng Zhang<sup>b,\*</sup>

<sup>a</sup> School of Optoelectronic Materials and Technology, Jiangnan University, 430056, Wuhan, P. R. China.

<sup>b</sup> College of Chemistry, Huazhong Agricultural University, 430070, Wuhan, P. R. China.

# These authors contributed equally.

\*To whom correspondence should be addressed.

E-mail: luwangting08@163.com (Wang-Ting Lu), zhanggeng@mail.hzau.edu.cn (Geng Zhang)

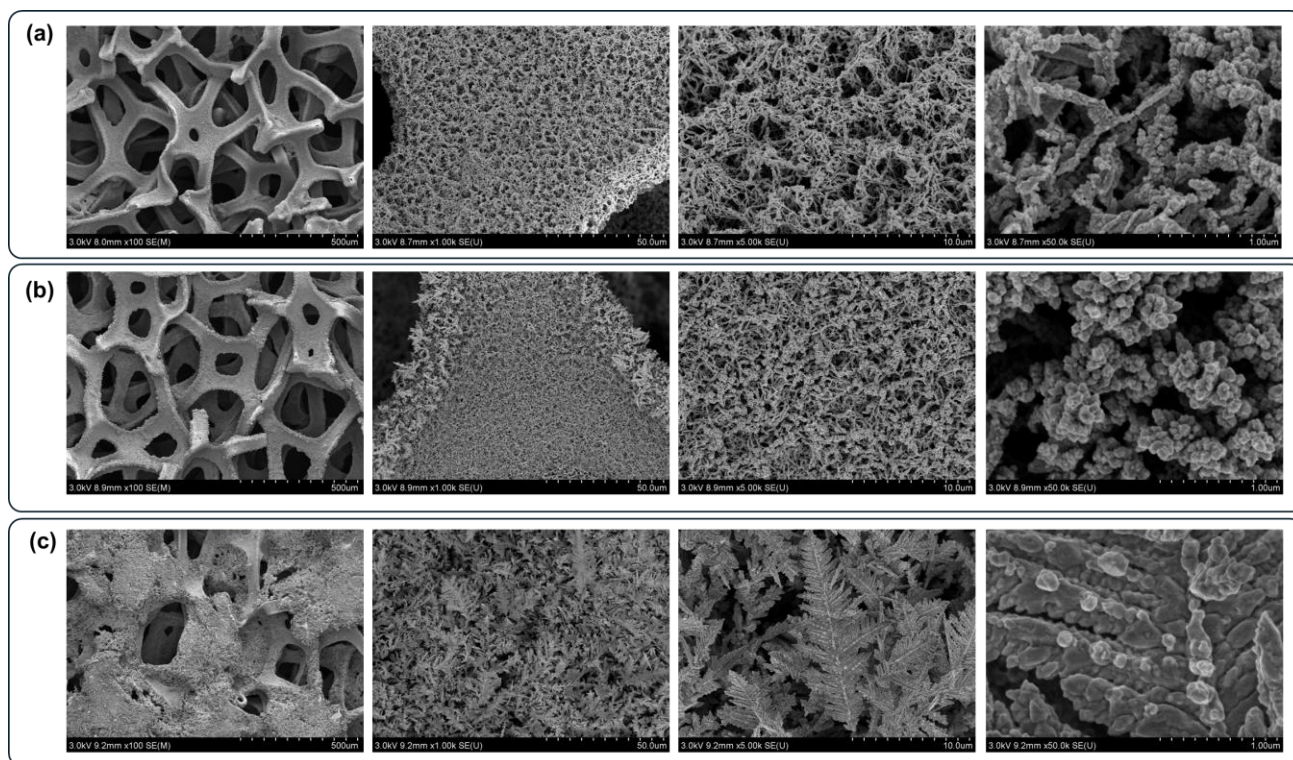

Figure S1. SEM images of (a) Ag<sub>5</sub>-Cu/CF, (b) Ag<sub>20</sub>-Cu/CF and (c) Ag<sub>100</sub>-Cu/CF.

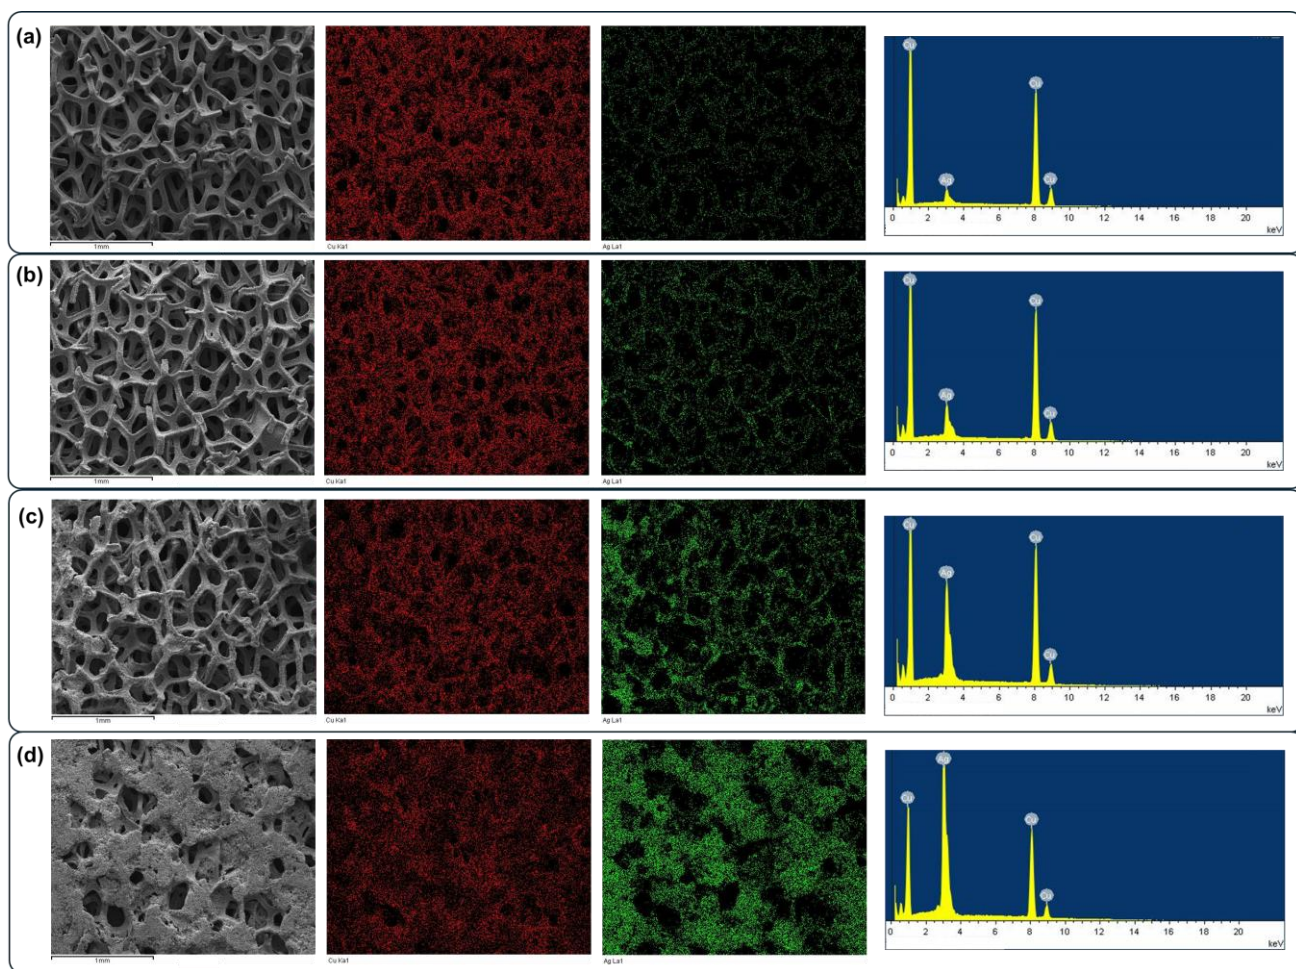

Figure S2. EDS mapping and spectrum of (a) Ag<sub>5</sub>-Cu/CF, (b) Ag<sub>20</sub>-Cu/CF, (c) Ag<sub>50</sub>-Cu/CF and (d) Ag<sub>100</sub>-Cu/CF.

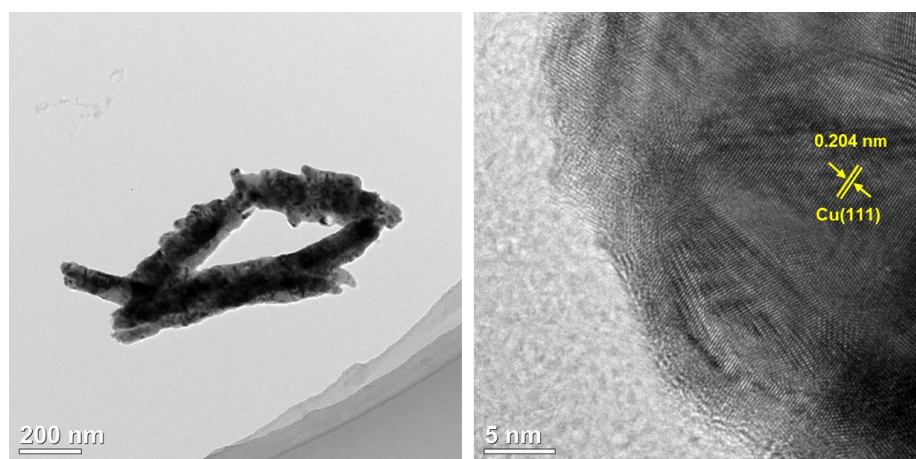

Figure S3. TEM images of Cu/CF.

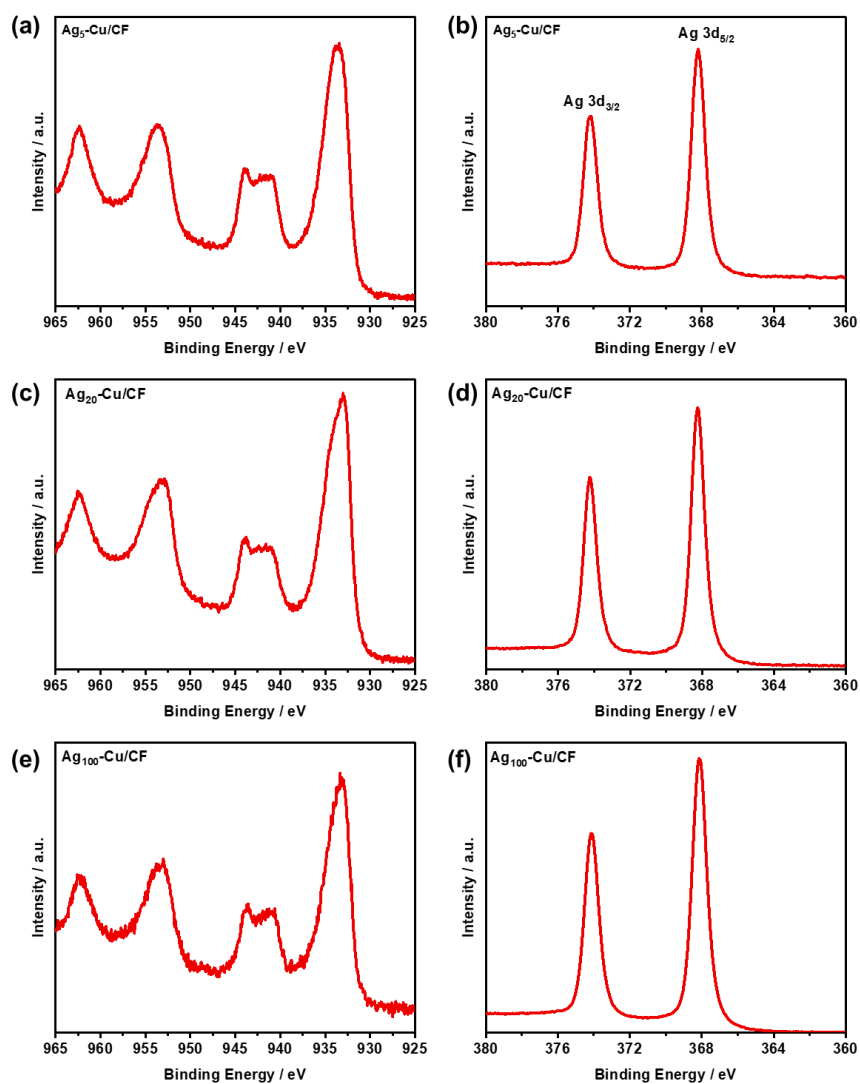

Figure S4. Cu 2p XPS spectra of (a) Ag<sub>5</sub>-Cu/CF, (c) Ag<sub>20</sub>-Cu/CF and (e) Ag<sub>100</sub>-Cu/CF. Ag 3d XPS spectra of (b) Ag<sub>5</sub>-Cu/CF, (d) Ag<sub>20</sub>-Cu/CF and (f) Ag<sub>100</sub>-Cu/CF.

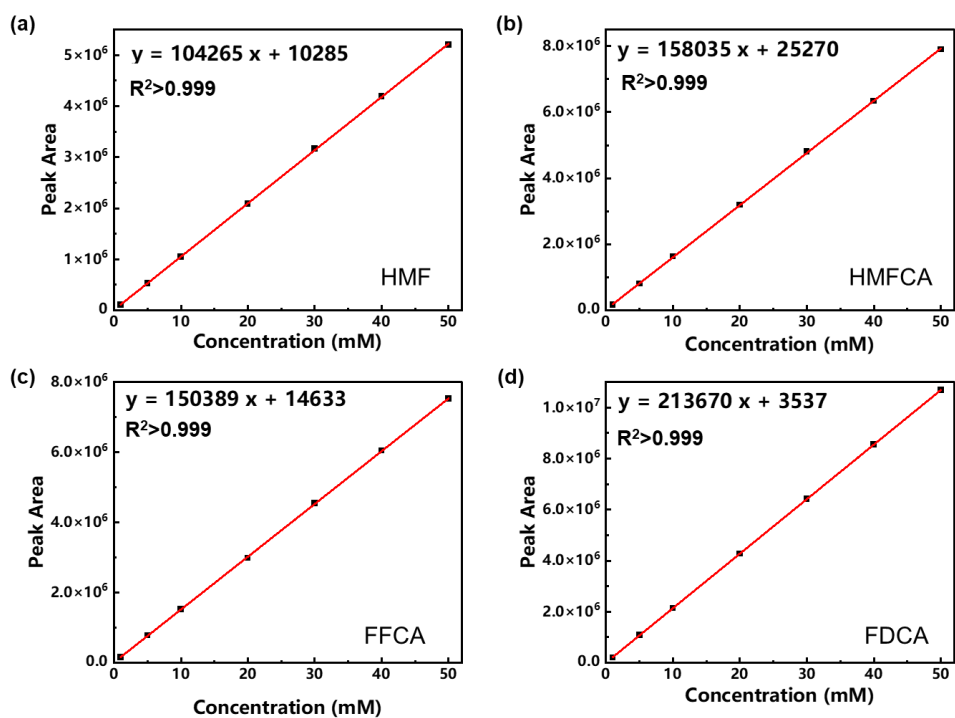

Figure S5. Standard curves of HMF, HMFCA, FFCA and FDCA.

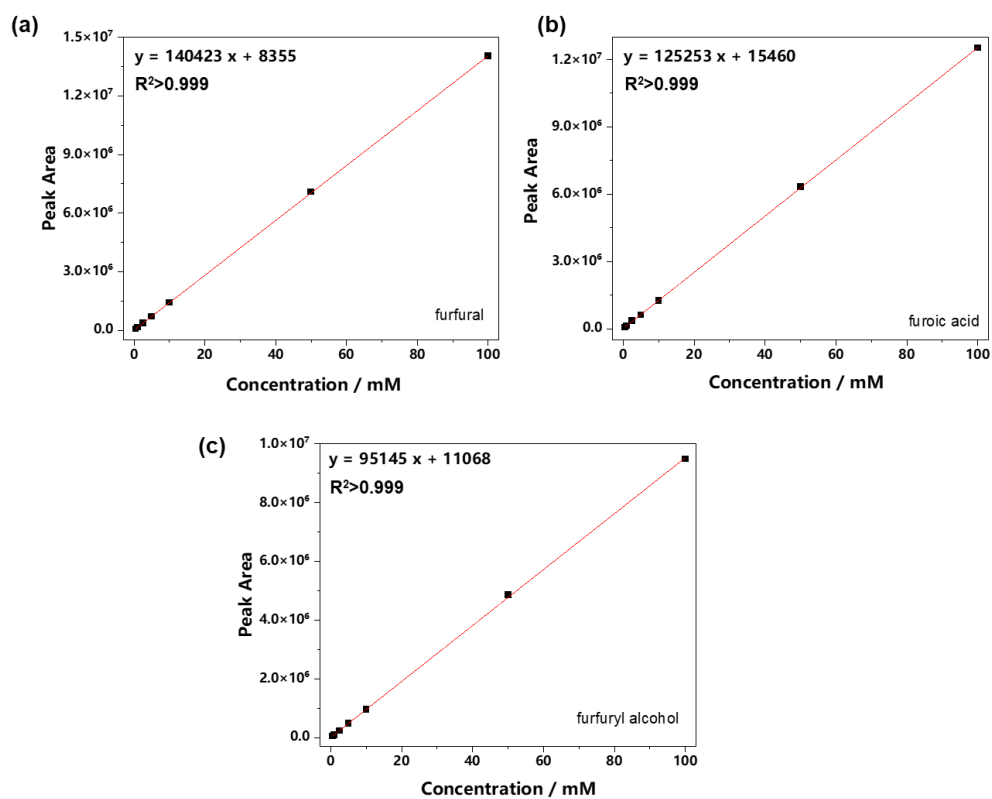

Figure S6. Standard curves of furfural, furoic acid and furfuryl alcohol.



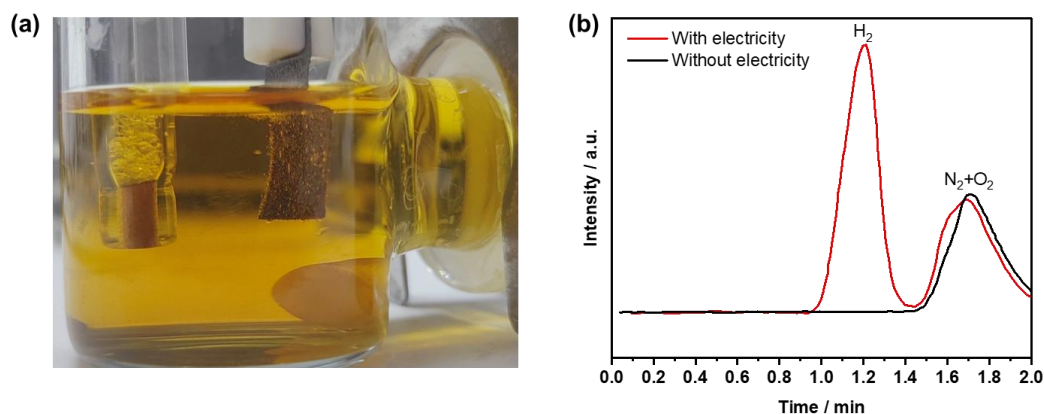

Figure S7. (a) Photograph of Ag<sub>50</sub>-Cu/CF electrode during electrochemical oxidative dehydrogenation of FF. (b) GC chromatograms of the gas above Ag<sub>50</sub>-Cu/CF electrode under different conditions. The retention time of H<sub>2</sub> was around 1.2 min.

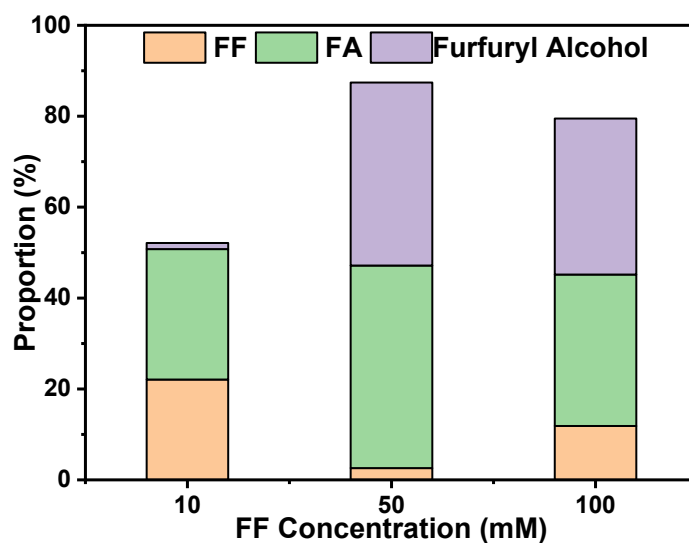

Figure S8. The compound proportion by placing Ag<sub>50</sub>-Cu/CF electrode in 1 M KOH solution (10 mL) of FF with different concentrations for three hours.

By placing Ag<sub>50</sub>-Cu/CF electrode in 1 M KOH solution (10 mL) of FF with 50 mM FF or 100 mM FF for three hours, nearly identical concentration of furfuryl alcohol and FA are generated, demonstrating the presence of Cannizzaro reaction ( $2\text{FF} + \text{H}_2\text{O} \rightarrow \text{FA} + \text{furfuryl alcohol}$ ). However, the Cannizzaro reaction is not obvious at low FF concentration of 10 mM.

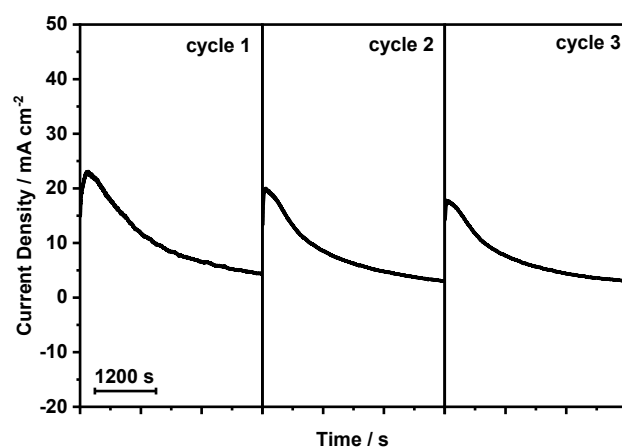

Figure S9. Current change with reaction time in three successive reaction cycles. The testing is performed in 1 M KOH+100 mM FF at 0.4 V.

Table S1. Performance comparison of electrochemical oxidative dehydrogenation of Ag<sub>50</sub>-Cu/CF with other recently reported electrodes.

| Electrode                   | Reactant /Product | Reaction type                             | Potential at 10 mA cm <sup>-2</sup> V | Conversion Rate % | FE %                         | References                                       |
|-----------------------------|-------------------|-------------------------------------------|---------------------------------------|-------------------|------------------------------|--------------------------------------------------|
| Ag <sub>50</sub> -Cu/CF     | FF/FA             | electrochemical oxidative dehydrogenation | 0.183                                 | 94                | 91                           | This Work                                        |
| CuPt <sub>0.01</sub> NWs/Cu | FF/FA             | electrochemical oxidative dehydrogenation | ~0.15                                 | n.a.              | ~90(@0.3 V <sub>RHE</sub> )  | Int. J. Hydrogen Energy 2025, 102, 856           |
| CuPt/Cu                     | FF/FA             | electrochemical oxidative dehydrogenation | ~0.12                                 | n.a.              | ~95(@0.4 V <sub>RHE</sub> )  | ACS Appl. Mater. Interfaces 2023, 15 (31), 37477 |
| CuAg <sub>glv</sub> /Cu     | FF/FA             | electrochemical oxidative dehydrogenation | ~0.18                                 | n.a.              | ~100(@0.4 V <sub>RHE</sub> ) | Energy Environ. Sci. 2022, 15, 4175              |
| PdCu                        | HCHO/HCOOH        | electrochemical oxidative dehydrogenation | ~0.30                                 | ~100              | ~100                         | Nat. Commun. 2024, 15 (1), 9852.                 |
| CuFe@CF                     | HCHO/HCOOH        | electrochemical oxidative dehydrogenation | ~0.25                                 | ~100              | ~100                         | Adv. Funct. Mater. 2024, 2417545                 |
| Pt/CuO@CF                   | HMF/FD CA         | Conventional electro-oxidation            | ~1.31                                 | ~100              | ~95                          | Adv. Mater. 2025, 2417684.                       |
| CuO–PdO                     | HMF/FD CA         | Conventional electro-oxidation            | ~1.34                                 | ~100              | 93.7                         | Adv. Mater. 2022, 34 (42), 2204089               |
| A-Cu-S/CF                   | HMF/FD CA         | Conventional electro-oxidation            | ~1.50                                 | ~100              | ~90                          | ChemSusChem 2022, 15 (23), 202201625             |
